# Supplementary material for: Multiplexed Detection of Pancreatic Cancer by Combining a Nanoparticle-Enabled Blood Test and Plasma Levels of Acute-Phase Proteins
Source: Cancers (Basel). 2022 Sep 25;14(19):4658. doi: 10.3390/cancers14194658 (PMC9563576; doi:10.3390/cancers14194658)
Supplement: Supplementary file 1 [file cancers-14-04658-s001.zip › Table_S2.xlsx]

## Sheet: Foglio1
Table S2. Relative protein abundance of plasma proteins in the corona of graphene oxide (GO) nanosheets after 1-hour incubation with 5% human plasma (HP) collected from 3 non-oncological patients (NOP) and 3 pancreatic ductal adenocarcinoma (PDAC) patients. For each sample, results are given as the average of three independent replicates.
	Gene name	Molecular weight [kDa]	Isoelectric point	NOP_1	NOP_2	NOP_3	PDAC_1	PDAC_2	PDAC_3
1	TMSB4X	5.0526	4.884	0.000149463	0	0	0	0	0
2	APOC1	9.3318	8.757	0.00373453	0.00321113	0.00285503	0.00232685	0.00211444	0.00205644
3	PF4;PF4V1	10.845	8.877	0.000795637	0.000638142	0.000711915	0.000224556	0.000170141	0.000151452
4	APOC3	10.852	5.121	0.002998	0.00132044	0.0014045	0.00209937	0.000819044	0.000948195
5	APOA2	11.175	6.438	0.0336474	0.0332693	0.0284196	0.0355719	0.0291568	0.0251523
6	IGLC7	11.253	8.19	0.00141154	0.00136464	0.00128249	0.000802558	0.000791226	0.000693464
7	IGLC3;IGLC2	11.265	6.967	0.0685747	0.0895522	0.0657454	0.0676325	0.0668712	0.0546991
8	APOC2	11.284	4.499	0.00228789	0.0020313	0.00174398	0.00381968	0.00311439	0.00253011
9	DCD	11.284	6.227	0.00119186	0.000883004	0.00129242	0.000922954	0.00104928	0.00120368
10	IGKC	11.765	5.599	0.00540018	0.00840976	0.00654352	0.00299688	0.00791975	0.00729748
11	IGLV2-23	11.893	8.585	0	0	0.00027668	0	0	2.38332e-05
12	IGLV3-25;IGLV3-16;IGLV3-27	12.011	4.468	0.000663671	0.000722357	0.000513266	0.00089019	0.000733554	0.000623326
13	IGLV3-19	12.042	6.187	0.000807658	0.000783502	0.000679708	0.000590631	0.000663433	0.000570673
14	IGLV1-51	12.249	7.897	0.000442725	0.00160643	0.0012592	0.0012733	0.00111197	0.000247276
15	IGLV1-47;IGLV1-44	12.283	6.946	0.000941034	0.000840533	0.000991261	0.000755612	0.000757028	0.000717784
16	IGLV1-40	12.301	9.457	0.000259552	0.000226313	0.000215947	0.00012866	0.000133813	0.000153683
17	IGLV3-9;IGLV3-21;IGLV3-12	12.332	5.357	0.000692302	0.000635421	0.000850506	0.000537712	0.000415896	0.000608087
18	IGKV6D-21	12.34	7.041	0.0001003	0.00011373	8.22718e-05	0	5.66428e-05	0
19	IGLV10-54	12.395	7.927	0.00016832	0.000222786	0	0	0	0
20	IGKV6-21	12.43	7.041	8.65898e-05	0.000108988	0	0	0	0
21	IGLV3-10	12.441	4.7635	0.00259269	0.00244931	0.00198751	0.0034441	0.00228831	0.00266303
22	IGLV7-46;IGLV7-43	12.468	6.834	0.00052839	0.0006689	0.000429768	0.000739787	0.000785172	0.000655879
23	IGKV3-15;IGKV3D-7	12.496	7.3325	0.00196045	0.00138086	0.00154842	0.0020574	0.00146026	0.00156131
24	IGHV3-13;IGHV3-20;IGHV3-43D;IGHV3-43;IGHV3-9	12.506	6.69	0	0	0	0	0	3.74814e-05
25	IGKV3D-20	12.515	4.306	0.000126149	0	0	9.67693e-05	8.93793e-05	0.000158755
26	IGKV3D-15	12.534	5.007	5.30004e-05	4.92559e-05	6.50927e-05	5.06756e-05	4.84241e-05	6.92301e-05
27	IGKV1-8;IGKV1-9;IGKV1-27	12.537	8.19	0	0	0	0	0	0
28	IGKV3-20	12.557	9.367	0.00134512	0.000941704	0.00125642	0.00105216	0.000990386	0.000952707
29	IGKV3D-11;IGKV3-11	12.625	4.875	8.07895e-05	5.04217e-05	7.91691e-05	5.87662e-05	3.67142e-05	0.000521058
30	IGHV1-69D;IGHV1-8;IGHV1-3;IGHV1-46;IGHV1-69	12.66	8.7265	0.000125982	0.000114308	0.000200281	0.000214041	0.00017029	0.000224748
31	IGHV5-51	12.674	8.167	0.000190197	0.000208083	0.000262751	0.000159263	0.000270358	0.000221434
32	IGLV4-69	12.773	6.173	0.000329619	0	0.000486329	0.000259658	0.000303184	0.000338103
33	IGKV1-17;IGKV1-6	12.778	8.585	0.000106506	6.29499e-05	9.74357e-05	8.06259e-05	0.000239205	0.000101769
34	IGHV3-64D	12.822	7.704	0.000122657	0.00032008	0.000292378	0.000370074	0.000388864	0.000522489
35	IGKV1-33;IGKV1D-33	12.848	5.326	0.000122153	6.44339e-05	0.0001099	7.64204e-05	7.38846e-05	8.29142e-05
36	IGHV1-69-2	12.87	4.58	0	0	0	0	0	0
37	IGHV3-64	12.891	7.709	0	6.21314e-05	9.27546e-05	0	7.39808e-05	6.27659e-05
38	IGHV3-15;IGHV3-73	12.926	8.9615	0.000396625	0.000313809	0.000447423	0.000169761	0.000236967	0.000268612
39	IGHV3-7;IGHV3-21;IGHV3-48;IGHV3-11	12.943	8.968	0.00142022	0.00165783	0.00214611	0.00165573	0.00140975	0.00136908
40	IGHV3-30-5;IGHV3-30;IGHV3-23	12.947	8.9625	3.95982e-05	6.5519e-05	0.000110858	0	0	0
41	IGKV2-28;IGKV2-40;IGKV2D-28;IGKV2D-40;IGKV2D-30	12.957	5.621	0.00253356	0.00207063	0.00294702	0.00192839	0.00184686	0.00226762
42	IGLV4-60	12.987	5.933	0	0	0.000133985	0	0	0
43	IGHV3-30-3;IGHV3-33;IGHV3-66;IGHV3-53	12.989	8.017	0.00151553	0.0016255	0.00262395	0.00179643	0.00146027	0.00154151
44	IGHV3-49	13.056	8.594	2.38331e-05	3.94067e-05	4.38967e-05	2.07188e-05	4.46983e-05	3.59546e-05
45	IGHV4-28	13.124	9.43	0	0	0.000124076	0	0	0.000144031
46	IGKV2-30	13.185	9.388	0.00011933	2.84545e-05	3.22523e-05	4.13967e-05	1.86029e-05	0
47	IGHV3-72	13.203	7.71	0	3.36593e-05	3.99934e-05	5.46057e-05	7.13963e-05	5.51715e-05
48	IGKV4-1	13.38	4.945	0.000405656	0.000407317	0.00035077	0.000412905	0.000484903	0.000326218
49	IGLV5-39;IGLV5-45	13.394	7.7315	0.000164195	0.000291793	0.000244797	3.68e-05	0.000168944	0.000203393
50	IGHV6-1	13.481	9.337	0.000151332	0.000166449	0.00014103	0.00015592	0.000165283	7.44249e-05
51	SAA2	13.527	9.308	0	0	0	3.27737e-05	4.10426e-05	3.7326e-05
52	SAA1	13.532	6.481	0.000150162	0.000147132	0.000140374	0.000814283	0.00068207	0.000721853
53	B2M	13.714	6.212	0	0	0	0	0	0
54	IGHV4-34;IGHV4-38-2;IGHV4-30-4;IGHV4-61;IGHV4-59;IGHV4-39	13.815	8.93	0.000553867	9.51322e-05	0.000747189	0.000406614	9.08565e-06	0.00020716
55	PPBP	13.894	8.799	0.000115616	0.000209636	0.000369576	5.14776e-05	7.65867e-05	9.20984e-05
56	APOC4	14.553	8.885	0	0	0	0	0	5.89027e-05
57	SAA4	14.746	9.206	0.000603489	0.000650254	0.00119266	0.000538177	0.000591161	0.000902366
58	PFN1	15.054	8.196	0	0	0	0	0	0
59	HBA1	15.257	8.555	0.0210469	0.0210001	0.0161027	0.0096901	0.0111354	0.00840739
60	CST3	15.799	8.72	2.20047e-05	0	3.73053e-05	0	1.38176e-05	2.27259e-05
61	TTR	15.887	5.5	0.00116698	0.00107444	0.00136392	0.000885471	0.00104659	0.00106911
62	HBB	15.998	6.956	0.0221606	0.020265	0.0180876	0.0116637	0.0107345	0.0103242
63	HBD	16.055	7.403	0.000105689	9.25525e-05	0.00011243	7.72074e-05	8.12988e-05	0.000118369
64	LYZ	16.537	9.165	1.72775e-05	4.48606e-05	9.90968e-05	3.17717e-05	2.48274e-05	9.02037e-05
65	PRH1	17.016	4.49	7.63253e-05	8.81797e-05	0	5.92174e-05	4.67451e-05	3.93102e-05
66	JCHAIN	18.098	4.964	0.000496493	0.000438268	0.000475942	0.000484041	0.000318909	0.000327698
67	RAP1A;RAP1B	20.987	5.513	3.61385e-06	0	0	0	0	0
68	APOM	21.253	5.729	0.000186447	0.000210178	0.000321932	0.000258878	0.000160744	0.00029751
69	APOD	21.275	4.932	1.70035e-05	2.10437e-05	2.79776e-05	1.22295e-05	1.97369e-05	2.78088e-05
70	C8G	22.277	8.24	0.000606412	0.000514305	0.000553859	0.000494428	0.000452009	0.000498096
71	TAGLN2	22.391	8.143	0	0	0	0	0	0
72	CLEC3B	22.537	5.44	6.60579e-05	0.00016735	0.000184939	5.72189e-05	4.51146e-05	5.85456e-05
73	IGLL5;IGLC1	22.83	8.2545	0.0271797	0.0276681	0.0300847	0.0158884	0.0149044	0.0150592
74	RBP4	23.01	5.749	0.000623626	0.000760487	0.000925339	0.000708798	0.000562077	0.000596516
75	IGC	23.379	8.163	0.0451159	0.0423855	0.0515887	0.0425973	0.0431164	0.0485827
76	ORM1	23.511	4.803	0	1.2921e-05	1.64725e-05	2.23172e-05	4.01943e-05	2.50154e-05
77	ORM2	23.602	4.905	0	0	0	0	0	0
78	TMPRSS13	24.409	8.457	0.0193828	0.0148237	0.018051	0.0224245	0.0198997	0.0239852
79	CRP	25.038	5.386	0	0	0	0.000162716	0.000127656	0.000161772
80	GPX3	25.552	8.014	2.245e-05	3.6246e-05	3.78304e-05	4.61273e-05	1.32301e-05	1.64117e-05
81	C1QC	25.773	8.318	0.000700101	0.000515802	0.00057512	0.000560451	0.000448678	0.000419089
82	C1QA	26.016	9.236	0.00011287	0.000177919	0.000115384	0.000110335	9.84078e-05	9.11963e-05
83	C1QB	26.721	8.609	0.000347796	0.000296561	0.000358092	0.000321623	0.00031597	0.000378121
84	CFD	27.033	7.488	2.38845e-05	2.57733e-05	0	0	4.11884e-05	0
85	TUBA4B;TUBA4A;TUBA8;TUBA1C;TUBA1B	27.551	4.821	4.33e-06	3.89598e-06	0	0	0	0
86	C4BPB	28.357	4.933	0.000306646	0.000279884	0.000180623	6.96245e-05	6.24837e-05	0.00014074
87	CA1	28.87	6.804	0.00020732	0.000132868	5.50898e-05	7.01095e-05	3.20946e-05	3.86558e-05
88	CFHR2	30.65	6.059	0	2.78108e-05	3.05781e-05	2.6446e-05	3.33689e-05	7.48511e-06
89	APOA1	30.777	5.524	0.111571	0.102221	0.087494	0.0904226	0.0806452	0.0744592
90	IGFBP3	31.674	8.523	1.44893e-05	1.45889e-05	1.27529e-05	0	0	0
91	FCN3	32.903	6.338	0.000165004	0.000163665	0.000177863	0.000221725	0.000203554	0.000232955
92	IGHG2	35.9	7.38	0.00899407	0.0104427	0.0115609	0.00934246	0.0119963	0.0113068
93	IGHG4	35.94	7.095	0.0043615	0.00570989	0.00368466	0.00372686	0.0038518	0.00323864
94	APOE	36.154	5.544	0.00212851	0.00169037	0.00210434	0.00443578	0.00400215	0.00364917
95	CFHR1	37.65	7.146	0.00013914	9.30608e-05	0.00010232	0.000111612	7.40636e-05	0.000116955
96	IGHA1	37.654	6.172	0.0177279	0.0156343	0.0168867	0.023384	0.0223177	0.0238781
97	CD5L	38.087	5.203	0.000267745	0.000282559	0.000258406	0.00015155	0.000135735	8.95413e-05
98	APOH	38.298	7.777	0.00168704	0.00182757	0.00140707	0.00125474	0.00110739	0.00108352
99	LUM	38.429	6.294	1.12781e-05	1.60883e-05	1.36179e-05	8.6785e-06	2.75456e-05	1.7373e-05
100	AMBP	38.999	5.959	3.19178e-05	4.84107e-05	0.000188524	5.04356e-05	6.23777e-05	5.90981e-05
101	HPR	39.029	6.76	0.000425051	0.000267711	0.000231539	0.000265347	0.000238143	0.00011777
102	AHSG	39.34	5.437	0.00330754	0.0024355	0.00222332	0.0044096	0.00365166	0.00360356
103	TSPY26P	39.572	7.943	0.000122468	9.3872e-05	0	0.000117714	7.59817e-05	7.58357e-05
104	PON1	39.731	4.988	7.24636e-05	9.1473e-05	0.000195259	0.000100344	7.80585e-05	0.000107263
105	IGHG3	41.287	7.711	0.0156766	0.0146535	0.014557	0.0178005	0.017299	0.0161247
106	ACTG1;ACTB	41.792	5.908	0.000794729	0.00070723	0.000623568	0.00015511	0.000186026	0.000181908
107	SELENOP	43.173	7.68	8.783e-05	7.39375e-05	5.15487e-05	0.000512341	0.00041595	0.000303364
108	APOL1	43.974	5.565	0.000225626	0.000254391	0.000184093	0.000202287	9.65795e-05	0.000164253
109	HP	45.205	6.253	0.0212867	0.0224281	0.0232721	0.0190583	0.0185988	0.0205392
110	APOA4	45.398	5.178	0.00313394	0.00282746	0.00222277	0.00217727	0.00219054	0.00170526
111	SERPINA5	45.674	9.469	1.57266e-05	2.28666e-05	3.11438e-05	6.33829e-06	6.65761e-06	1.41153e-05
112	SERPINF1	46.312	6.083	0.000174859	0.000108177	0.00012869	4.38434e-05	7.83088e-05	5.79285e-05
113	LRR1	46.722	9.18	0.000172821	0.000158424	0.000115601	6.3959e-05	0.000124037	4.83858e-05
114	SERPINA1	46.736	6.544	0.00910435	0.0115202	0.0100843	0.0264841	0.0256592	0.0237967
115	SERPINA3	47.65	5.255	0.00048263	0.000449724	0.00053467	0.00136176	0.0014573	0.00149336
116	SERPINA4	48.541	7.524	3.96997e-05	6.94627e-05	5.93706e-05	5.45953e-05	7.93805e-05	6.78999e-05
117	IGA2	48.934	8.611	0.000919856	0.000783501	0.000786547	0.000761134	0.000418781	0.000477083
118	IGHG1	49.328	8.048	0.0346866	0.0295759	0.041781	0.0241985	0.0234905	0.025602
119	IGHM	49.439	6.44	0.00987271	0.00864824	0.00868035	0.0056529	0.00535494	0.00585076
120	TUBB1	50.326	4.942	1.40498e-06	2.7757e-06	3.85279e-06	0	0	0
121	KRT16	51.267	4.848	0.000313386	0.000263414	0.000287901	0.000104264	7.8329e-05	0.000133842
122	CFP	51.276	7.697	0	1.55808e-05	0	0	0	0
123	FGG	51.511	5.323	0.0225739	0.0173745	0.0191955	0.0217508	0.0207643	0.0209958
124	KRT14	51.621	4.955	0.000221644	0.000218913	0.00028858	6.97321e-05	8.23361e-05	9.30402e-05
125	HPX	51.676	6.669	0.00416234	0.00379364	0.00372314	0.00354797	0.00347418	0.00352978
126	CPN1	52.286	7.022	1.47104e-05	3.67622e-05	6.24045e-06	3.35522e-05	2.97979e-05	4.12343e-05
127	CLU	52.494	5.973	0.00130095	0.000850435	0.00102493	0.00129938	0.00108774	0.00123116
128	SERPINC1	52.602	6.399	0.00191247	0.00215979	0.00243592	0.00226871	0.00248547	0.00284877
129	GC	52.917	5.302	0.0036751	0.00437376	0.002589	0.00553319	0.00541921	0.00437003
130	SIGLEC16	52.991	8.98	0.00140065	0.000412115	0.000795612	0.00242906	0.00157595	0.000143659
131	AGT	53.154	6.003	0.000217577	0.000256603	0.000338904	0.000314956	0.000437124	0.000402007
132	LBP	53.383	6.387	3.01099e-05	5.7675e-05	5.21802e-05	4.70225e-05	9.78048e-05	8.14244e-05
133	A1BG	54.253	5.596	0.000272563	0.00018637	0.000218751	0.000468736	0.000451905	0.000470253
134	VTN	54.305	5.519	0.000814931	0.000774662	0.000778722	0.000971781	0.000716462	0.000840145
135	SERPINF2	54.565	5.986	0.000119889	0.000168043	0.000247024	0.000249549	0.000273233	0.000151617
136	SERPING1	55.154	6.232	0.00110799	0.000989905	0.00109317	0.000778515	0.000816727	0.000784482
137	FGB	55.928	8.11	0.0152123	0.0110519	0.0140123	0.0169268	0.0136023	0.0148009
138	IGHD	56.224	7.767	3.14395e-05	3.15802e-05	4.74729e-05	5.10392e-05	4.95606e-05	6.47911e-05
139	SERPIND1	57.07	6.58	0.000181984	0.000217432	0.000273929	0.000260388	0.000330464	0.000344835
140	KRT10	59.51	4.751	0.00342192	0.00296581	0.00293419	0.00274351	0.0022905	0.00233243
141	HRG	59.578	7.189	0.000701513	0.000668927	0.00119463	0.000340734	0.000395163	0.000482691
142	KRT6C;KRT6A	60.024	7.857	4.49255e-05	4.0673e-05	3.06963e-05	2.98052e-05	2.10953e-05	2.07815e-05
143	KRT6B	60.066	7.857	0.000225769	0.00026783	0.000211502	0.00012683	0.000103671	0.000110065
144	KRT9	62.129	5.02	0.00222853	0.00240014	0.00282191	0.0011895	0.00183646	0.00183256
145	PGLYRP2	62.216	7.262	3.24509e-05	2.55875e-05	4.32078e-05	2.8186e-05	4.06298e-05	2.93415e-05
146	KRT5	62.378	7.556	0.000196127	0.000238663	0.000266729	0.000166843	0.000185086	0.000205451
147	C9	63.173	5.34	5.8374e-05	0.000104459	0.00014027	0.000107691	0.000177806	0.000185136
148	IGM	63.485	8.187	1.01542e-05	7.11795e-06	5.04712e-06	9.40065e-06	7.07374e-06	6.33083e-06
149	KPRP	64.135	8.046	0	2.47139e-05	1.70829e-05	0	1.26528e-05	0
150	C8A	65.163	6.124	9.99945e-05	8.96637e-05	7.97545e-05	9.79743e-05	9.18347e-05	0.000106644
151	LGALS3BP	65.33	4.999	2.60019e-05	2.34764e-05	2.4666e-05	2.22969e-05	3.09646e-05	2.51024e-05
152	KRT2	65.432	6.582	0.000933381	0.00102376	0.00108724	0.000859818	0.000927364	0.000938094
153	CFI	65.75	7.281	0.000108697	0.000115288	9.76643e-05	0.000104528	0.000107518	8.58743e-05
154	IGFALS	66.034	6.455	0.000114428	9.29133e-05	0.00011735	3.38185e-05	5.42006e-05	9.58915e-06
155	KRT1	66.038	8.045	0.00735178	0.00845419	0.00743105	0.00540472	0.00509079	0.00474162
156	C4BPA	67.033	7.007	0.00151235	0.00162992	0.0013324	0.00113837	0.00108004	0.00108368
157	C8B	67.046	7.924	4.11745e-05	5.74832e-05	4.65917e-05	7.41118e-05	5.09207e-05	3.86437e-05
158	F12	67.791	7.533	0.000166989	0.000155555	0.000152149	0.000105132	9.56832e-05	0.000121713
159	AFM	69.068	5.627	6.9931e-05	2.89674e-05	7.94001e-05	0.000133815	0.00015498	0.000115994
160	ALB	69.366	5.974	0.310798	0.324456	0.343262	0.347771	0.384	0.400862
161	F2	70.036	5.618	0.000240879	0.000200969	0.000331845	0.00017032	0.000161871	0.000257502
162	KLKB1	71.369	8.015	0.000364046	0.000286197	0.000253675	0.000128638	0.000108379	4.98322e-05
163	KNG1	71.957	6.475	0.00143843	0.00174741	0.0017627	0.00123734	0.00126776	0.00151247
164	TGFBI	74.68	7.476	0	0	0	0	0	0
165	PROS1	75.122	5.41	0.00016066	0.000137767	8.01597e-05	0.000128213	9.92453e-05	7.50492e-05
166	F13B	75.51	6.075	0.000258093	0.000512226	0.000717682	0.000254434	0.000391826	0.000433429
167	FERMT3	75.952	6.654	0	0	1.1882e-05	0	0	0
168	C1S	76.684	4.713	5.5789e-05	6.54214e-05	5.4937e-05	8.7897e-05	7.34502e-05	2.63374e-05
169	TF	77.063	6.795	0.0309028	0.0303202	0.0300929	0.0355584	0.031374	0.0300811
170	C1R	80.118	5.894	2.48238e-05	2.42838e-05	2.26201e-05	3.64416e-05	2.91797e-05	2.39502e-05
171	PBXIP1	80.642	5.104	6.01169e-05	5.57446e-05	3.97232e-05	9.49079e-05	7.99004e-05	7.16206e-05
172	QSOX1	82.577	8.942	0	0	0	0	0	0
173	C2	83.267	7.129	9.90364e-05	0.000137749	0.000126569	0.000139195	0.000181708	0.000124818
174	PIGR	83.283	5.502	0	7.57158e-06	0	4.38608e-05	3.44466e-05	3.61108e-05
175	CFB	85.532	6.727	0.00198418	0.00196837	0.00183943	0.00268869	0.00207373	0.00234281
176	GSN	85.696	5.98	0.000700075	0.000639739	0.000683173	0.000410758	0.000319575	0.000302344
177	ITGB3	87.057	4.964	7.98205e-06	7.58799e-06	6.64213e-06	0	0	0
178	PLG	90.568	6.221	0.00217429	0.00161693	0.00162559	0.0017105	0.00119363	0.001306
179	C7	93.517	6.146	0.000177866	0.000246047	0.000194058	0.000195433	0.000230148	0.000187508
180	FGA	94.972	5.733	0.0243713	0.0261709	0.0240743	0.0269461	0.0265571	0.0252224
181	ITIH1	101.39	6.466	0.000122706	9.72309e-05	0.000136895	0.000145004	0.000131324	0.00014773
182	ITIH4	103.36	6.667	0.00180925	0.00174835	0.00133515	0.00188535	0.00183066	0.00161157
183	C6	104.79	6.418	0.000165109	0.000149003	0.000146261	8.8213e-05	9.72183e-05	0.000100434
184	ITIH2	106.46	6.544	0.000365775	0.00025828	0.000416097	0.000405968	0.000592934	0.000519608
185	CP	122.2	5.443	0.00133732	0.000991745	0.000886909	0.00207191	0.00154716	0.00161986
186	STXBP5	127.57	6.969	0	0	0	0	0.000106117	0
187	THBS1	129.38	4.569	2.57748e-05	2.55453e-05	2.63294e-05	3.51033e-06	2.86183e-06	2.61158e-06
188	CFH	139.09	6.7915	0.001323	0.00129947	0.00149956	0.00128727	0.00118266	0.00136309
189	ATAD2	158.55	6.02	1.60395e-05	7.4901e-06	9.48206e-06	1.00854e-05	0	6.23301e-06
190	A2M	163.29	6.149	0.00315623	0.00308133	0.0025868	0.00485412	0.00428528	0.00422189
191	ABCA10	175.79	6.33	6.79308e-07	1.95484e-06	2.47154e-06	0	0	0
192	C3	187.15	6.264	0.0150881	0.0137264	0.015488	0.0169064	0.0153051	0.0161365
193	C5	188.3	6.21	0.000176802	0.000140564	0.000184069	0.00024639	0.000209366	0.000237309
194	C4B	192.75	6.949	3.43908e-06	2.41999e-06	5.99574e-06	2.8983e-06	2.86541e-06	4.47913e-06
195	C4A	192.78	6.747	0.00247033	0.00252436	0.00280524	0.00240475	0.00235558	0.00238784
196	MYO5A	215.4	8.386	0	0	0	0	0	0
197	MYH9	226.53	5.402	6.18148e-06	8.86888e-06	8.47446e-06	0	0	0
198	FN1	262.62	5.432	0.000373277	0.000300828	0.000241448	0.000321181	0.000300941	0.000275495
199	TLN1	269.76	5.805	1.51031e-05	1.92016e-05	1.18115e-05	8.58462e-06	6.54921e-06	5.20988e-06
200	FLNA	280.74	5.769	3.57176e-06	3.3805e-06	4.80696e-06	0	0	0
201	HRNR	282.39	10.139	0.00010329	0.000150324	0.000112895	5.08826e-05	5.81712e-05	5.55995e-05
202	CELSR2	317.45	5.039	2.16961e-06	3.63898e-06	4.66629e-05	3.44997e-05	8.56598e-06	6.8789e-06
203	DSP	331.77	6.501	2.42874e-07	6.1934e-07	6.26413e-07	2.17093e-07	5.04263e-07	2.61674e-07
204	FLG	435.16	9.354	5.78325e-07	9.21654e-07	8.65276e-07	1.04506e-06	1.16082e-06	0
205	LPA	501.31	5.61	0	0	5.03322e-07	6.7139e-07	4.71361e-07	0
206	APOB	515.6	6.729	0.00074728	0.000702271	0.000662951	0.00121521	0.00115575	0.0011613
207	RYR2	564.56	5.796	2.8774e-05	1.09999e-05	2.00604e-05	2.21251e-05	1.14439e-05	1.97707e-05
